# Supplementary material for: Cenozoic aridization in Central Eurasia shaped diversification of toad-headed agamas (Phrynocephalus; Agamidae, Reptilia)
Source: PeerJ. 2018 Mar 19;6:e4543. doi: 10.7717/peerj.4543 (PMC5863718; doi:10.7717/peerj.4543)
Supplement: Supplemental Information 19 — “F,” “L”–forward primer, “R,” “H”–reverse primer. [file peerj-06-4543-s019.docx]

| **Gene** | **Primer name** | **Sequence of 3`–5`** | **Source** |
| --- | --- | --- | --- |
| *COI* | VF1d | TTCTCAACCAACCACAARGAYATYGG | Ivanova *et al.* 2006 |
| VR1d | TAGACTTCTGGGTGGCCRAAYCA |
| R107a | GGCRTGRAGTGTAATAAAGGTGTTGTATA | This study; primer pairs designed for analysis of degraded old DNA from historical collections |
| F82 | CCAGGCCAAYACARCGGAGATAC |
| R268 | TTGATGATATTARGAGTAARAAGAATGATGG |
| F250 | AAGTTTCTGATTATTACCCCCATC |
| R372a | GMGAAAATRGTTATRTCTATTGATGG |
| F354 | CATAGCACACTCAAGCCCATCAATAGA |
| R490a | AATACGGATCAGACRAATAGYGGTCA |
| F453 | CATYAACATAACCCCACAYTCAACAA |
| R580a | CAAAGAATGTTGTRTTTAGGTTTCGGTCTGT |
| F539 | ATYCCAGTAYTAGCAGCAGCCATTAC |
| *ND2* | L4447 | AAGCAGTTGGGCCCATGCCCCAAAAACGG | Wang & Fu 2004 |
| H5622 | TATTTTAATTAAAATATCTGAGTTGCA |
| tRNA-Met | AAGCAGTTGGGCCCATRCC | Macey *et al.* 2000 |
| *COI* | AGRGTTCCRATRTCTTTRTGRTT |
| *ND4* | ND4 | CACCTATGACTACCAAAAGCTCATGTAGAAGC | Arevalo *et al.* 1994 |
| LEU | CATTACTTTTACTTGCACCA |
| 110R | TTATAATAATTCCTCATGTGGCTATTGC | This study; primer pairs designed for analysis of degraded old DNA from historical collections |
| 76F | CCAATAAACATCCCAACCACCTTAA |
| 180R | CCTACTGAGGAGTAGGCAATAAG |
| 117F | AATTGCAATAGCCACATGAGGAATT |
| 240R | GAGGTGCTCCATGGGGTTTGAA |
| 195F | CTCAGTAGGCCACATAGGACTAG |
| 331R | ATTCGGGTGTTTGTTCGTTC |
| 253F | ACCTCCGGGGCAATTATCCT |
| 428R | TTAGRTTRATTGTTGGGGGTAGTGCTA |
| 346F | GACCAAACACCCGAATACTAAT |
| 511R | GGTTGCTCCTGTGGCRGTTA |
| 452F | AACAATCAACCTAATTGGAGAAATC |
| 590R | GGGCAGGRCAAATTCCTTTTGARTCTT |
| 527F | AACCATTACAGCAATCTACTC |
| *Cytb* | L14841 | AAAAAGCTTCCATCCAACATCTCAGCATGATGAAA | Pang *et al.* 2003 |
| H15149 | AAACTGCAGCCCCTCAGAATGATATTTGTCCTCA |
| 180R | ATCCGTARTAGATTCCCCGTCC | This study; primer pairs designed for analysis of degraded old DNA from historical collections (the reverse primer, works with L14841 as a forward primer) |
| *RAG-1* | RAG-1-F | CAAAGTGAGACSACTTGGAAAGCC | Shoo *et al.* 2008 |
| RAG-1-R | CATTTTTCAAGGGTGGTTTCCACTC |
| Phryn-670r | GGTTTCTACAGGATCAGCCAGGATA | This study |
| Phryn-522f | GTCATGTGAGGAATGTAAAACAAGTGAAC |
| *BDNF* | BDNF-F | gACCATCCTTTTCCTKACTATggTTATTTCA | Townsend *et al.* 2008 |
| BDNF-R | CTATCTTCCCCTTTTAATggTCAgTgTACAAAC |
| *AKAP9* | R1276 | TGCCTGTTCTTGTCCTCCTCTAAATC | Townsend *et al.* 2011 |
| F88 | GGTAATACCAGTGAAGACCAAATACAC |
| f627a | GGAGAACATGGTTATGCAAGCTAAACAG | This study |
| r810b | GGAGGKTGTGGATTTGAAGCATC |
| *NKTR* | F414 | GGACGGCAAGAAGCAAACGGCAG | Townsend *et al.* 2011 |
| R1278a | CGATCGGGTGCGGCTCCTTGAC |
| r931 | CTACTGCAGCAGCTATGGTGGGAGGTTG | This study |
| f686 | GCGAAGGAGAAGTTAACCAGATGGATGCA |
